# Supplementary material
Source: Springer Nature journal article supplement (https://www.springermedizin.de/resource/supplementary/12885_2014_4792_MOESM4_ESM.pdf/9467278)
Supplement: MOESM4 [file 9467278]

**A****SW480**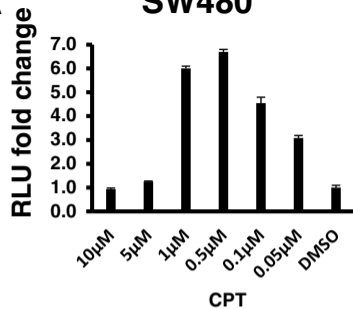**CPT****RLU fold change**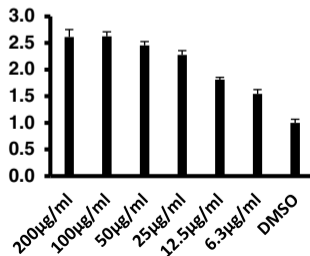**Phleomycin****B****HCT116 wt**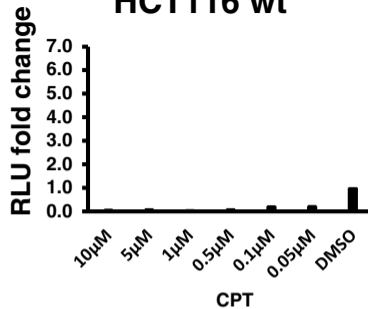**CPT****RLU fold change**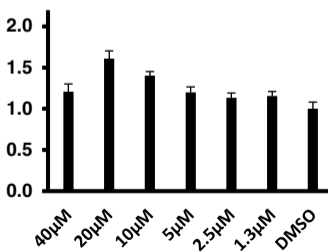**Erlotinib****C****HCT116 p53null**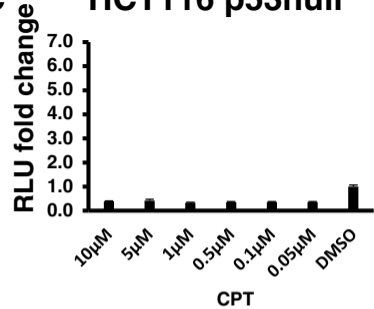**CPT****RLU fold change**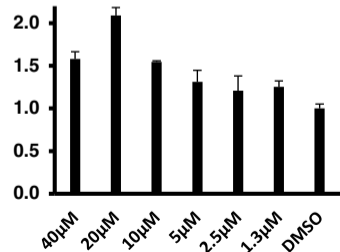**Erlotinib**
